# Supplementary material
Source: ML conference proceedings conference paper supplement (https://openaccess.thecvf.com/content/cvpr_2016/html/Verleysen_Piecewise-Planar_3D_Approximation_2016_CVPR_paper.html)
Supplement: Supplementary file 1 [file Verleysen_Piecewise-Planar_3D_Approximation_2016_CVPR_supplemental.zip]

Archive with 10 entries (8 files):
- Piecewise_planar_3D_approximation_from_wide_baseline_stereo_SUPPLEMENTARY_MATERIAL/
- Piecewise_planar_3D_approximation_from_wide_baseline_stereo_SUPPLEMENTARY_MATERIAL/Piecewise_planar_3D_approximation_from_wide_baseline_stereo_SUPPLEMENTARY_MATERIAL.pdf
- Piecewise_planar_3D_approximation_from_wide_baseline_stereo_SUPPLEMENTARY_MATERIAL/Videos/
- Piecewise_planar_3D_approximation_from_wide_baseline_stereo_SUPPLEMENTARY_MATERIAL/Videos/castle_transition.mov
- Piecewise_planar_3D_approximation_from_wide_baseline_stereo_SUPPLEMENTARY_MATERIAL/Videos/corridor_transition.mov
- Piecewise_planar_3D_approximation_from_wide_baseline_stereo_SUPPLEMENTARY_MATERIAL/Videos/fountain_transition.mov
- Piecewise_planar_3D_approximation_from_wide_baseline_stereo_SUPPLEMENTARY_MATERIAL/Videos/library_transition.mov
- Piecewise_planar_3D_approximation_from_wide_baseline_stereo_SUPPLEMENTARY_MATERIAL/Videos/mertonIII_transition.mov
- Piecewise_planar_3D_approximation_from_wide_baseline_stereo_SUPPLEMENTARY_MATERIAL/Videos/mertonII_transition.mov
- Piecewise_planar_3D_approximation_from_wide_baseline_stereo_SUPPLEMENTARY_MATERIAL/Videos/model_house_transition.mov
